# Supplementary material for: Assessment of antimycobacterial activities of pure compounds extracted from Thai medicinal plants against clarithromycin-resistant Mycobacterium abscessus
Source: PeerJ. 2021 Oct 26;9:e12391. doi: 10.7717/peerj.12391 (PMC8555507; doi:10.7717/peerj.12391)
Supplement: Supplemental Information 2 — Raw data of the relationship between the colony morphotypes of M. abcessus isolates and their susceptibility to the compounds and clarithromycin. [file peerj-09-12391-s002.xlsx]

## Sheet: Statistical analysis
The relationship between the colony morphotypes of M. abcessus isolates and their susceptibility to the compounds and clarithromycin
Colony morphotype	Susceptibility of clarithromycin and compound combinations
	CLA/RL008		CLA/RL009		CLA/RL011		CLA/RL012		CLA/RL013
	Susceptible	Non-susceptible	Susceptible	Non-susceptible	Susceptible	Non-susceptible	Susceptible	Non-susceptible	Susceptible	Non-susceptible
Smooth (n=5)	0	5 (100)	2 (40)	3 (60)	0	5 (100)	0	5 (100)	0	5 (100)
Rough (n=6)	3 (50)	3 (50)	3 (50)	3 (50)	3 (50)	3 (50)	2 (33.33)	4 (66.67)	3 (50)	3 (50)
Mixed (n=3)	0	3 (100)	0	3 (100)	0	3 (100)	0	3 (100)	0	3 (100)
Total (n=14)	3 (21.43)	11 (78.57)	5 (35.71)	9 (64.29)	3 (21.43)	11 (78.57)	2 (14.29)	12 (85.71)	3 (21.43)	11 (78.57)
P-values between groups
Smooth vs Rough	0.182		1		0.182		0.455		0.182
Smooth vs Mixed	NA		0.464		NA		NA		NA
Rough vs Mixed	NA		0.464		NA		NA		NA
Non-susceptible refers to the combination between intermediate (MIC= 4 µg/mL) and resistant (MIC ≥8 µg/mL) phenotype of M. abcessus susceptibility.
P-values were calculated using Fisher’s exact test for assessment of association of the frequency between groups
NA, not available.
