# Supplementary material for: Assessment of antimycobacterial activities of pure compounds extracted from Thai medicinal plants against clarithromycin-resistant Mycobacterium abscessus
Source: PeerJ. 2021 Oct 26;9:e12391. doi: 10.7717/peerj.12391 (PMC8555507; doi:10.7717/peerj.12391)
Supplement: Supplemental Information 3 [file peerj-09-12391-s003.xlsx]

## Sheet: %Hemolysis
Hemolytic activity of plant secondary metabolites against red blood cells (RBCs).
Round 1
Conc. plant compounds (ug/ml)	RL008						RL009						RL011						RL012						RL013
	1	2	3	4	Mean	%hemolysis	1	2	3	4	Mean	%hemolysis	1	2	3	4	Mean	%hemolysis	1	2	3	4	Mean	%hemolysis	1	2	3	4	Mean	%hemolysis
128	-0.012	-0.009	-0.028	-0.038	-0.02175	-13.6386	0.05	0.02	0.021	0.018	0.02725	-3.98818	0.016	0.016	0.022	0.023	0.01925	-5.56376	-0.023	-0.0205	-0.022	-0.017	-0.020625	-13.417	0.008	0.01	-0.001	-0.008	0.00225	-8.91187
64	-0.003	-0.001	0.003	0	-0.00025	-9.40423	0.035	0.021	0.017	0.015	0.022	-5.02216	0.012	0.022	0.023	0.034	0.02275	-4.87445	-0.008	-0.0095	-0.002	0.003	-0.004125	-10.1674	0.012	0.01	0.01	0.013	0.01125	-7.13934
32	-0.001	0.001	0.009	0.002	0.00275	-8.81339	0.025	0.018	0.015	0.02	0.0195	-5.51452	0.014	0.016	0.018	0.018	0.0165	-6.10537	0	0.0015	0.012	0.01	0.005875	-8.19793	0.018	0.014	0.017	0.014	0.01575	-6.25308
16	0.009	0.004	0.016	0.013	0.0105	-7.28705	0.015	0.02	0.018	0.017	0.0175	-5.90842	0.013	0.012	0.022	0.02	0.01675	-6.05613	0.005	0.004	0.017	0.014	0.01	-7.38552	0.016	0.012	0.022	0.02	0.0175	-5.90842
8	0.009	0.008	0.015	0.017	0.01225	-6.94239	0.013	0.017	0.015	0.014	0.01475	-6.45002	0.011	0.016	0.02	0.017	0.016	-6.20384	0.012	0.0095	0.016	0.012	0.012375	-6.91777	0.013	0.011	0.016	0.019	0.01475	-6.45002
4	0.011	0.013	0.019	0.018	0.01525	-6.35155	0.011	0.015	0.013	0.013	0.013	-6.79468	0.011	0.009	0.018	0.018	0.014	-6.59774	0.013	0.016	0.016	0.014	0.01475	-6.45002	0.014	0.011	0.018	0.022	0.01625	-6.1546
2	0.011	0.011	0.024	0.017	0.01575	-6.25308	0.011	0.013	-0.001	0.001	0.006	-8.17331	0.012	0.015	0.018	0.018	0.01575	-6.25308	0.012	0.0115	0.017	0.017	0.014375	-6.52388	0.008	0.008	0.015	0.015	0.0115	-7.0901
1	0.012	0.012	0.018	0.014	0.014	-6.59774	0.015	0.015	0.013	0.014	0.01425	-6.5485	0.012	0.014	0.019	0.017	0.0155	-6.30231	0.011	0.011	0.015	0.012	0.01225	-6.94239	0.014	0.01	0.018	0.021	0.01575	-6.25308
Positive Control	0.594	0.598	0.503	0.526	0.55525
Negative Control	0.041	0.042	0.054	0.053	0.0475
Round 2
Conc. plant compounds (ug/ml)	RL008						RL009						RL011						RL012						RL013
	1	2	3	4	Mean	%hemolysis	1	2	3	4	Mean	%hemolysis	1	2	3	4	Mean	%hemolysis	1	2	3	4	Mean	%hemolysis	1	2	3	4	Mean	%hemolysis
128	-0.012	-0.009	-0.025	-0.037	-0.02075	-13.3172	0.05	0.017	0.021	0.018	0.0265	-4.16465	0.016	0.016	0.022	0.023	0.01925	-5.56901	-0.023	-0.0205	-0.022	-0.017	-0.020625	-13.293	0.008	0.01	-0.002	-0.008	0.002	-8.91041
64	-0.005	-0.002	0.004	0.001	-0.0005	-9.39467	0.035	0.019	0.017	0.015	0.0215	-5.13317	0.012	0.022	0.023	0.034	0.02275	-4.89104	-0.008	-0.009	-0.002	0.002	-0.00425	-10.1211	0.012	0.01	0.009	0.012	0.01075	-7.2155
32	0	0.001	0.011	0.002	0.0035	-8.61985	0.024	0.022	0.015	0.02	0.02025	-5.3753	0.014	0.016	0.018	0.018	0.0165	-6.10169	0	0.0015	0.012	0.009	0.005625	-8.20823	0.018	0.013	0.017	0.016	0.016	-6.19855
16	0.009	0.005	0.016	0.013	0.01075	-7.2155	0.015	0.019	0.018	0.017	0.01725	-5.95642	0.013	0.013	0.022	0.02	0.017	-6.00484	0.005	0.004	0.016	0.013	0.0095	-7.45763	0.016	0.012	0.022	0.021	0.01775	-5.85956
8	0.009	0.008	0.015	0.018	0.0125	-6.87651	0.013	0.016	0.015	0.014	0.0145	-6.4891	0.012	0.016	0.02	0.017	0.01625	-6.15012	0.013	0.01	0.016	0.012	0.01275	-6.82809	0.013	0.011	0.016	0.019	0.01475	-6.44068
4	0.011	0.014	0.019	0.018	0.0155	-6.2954	0.012	0.015	0.013	0.014	0.0135	-6.68281	0.011	0.01	0.018	0.018	0.01425	-6.53753	0.013	0.0155	0.015	0.013	0.014125	-6.56174	0.014	0.011	0.018	0.022	0.01625	-6.15012
2	0.011	0.011	0.024	0.017	0.01575	-6.24697	0.011	0.015	-0.005	-0.002	0.00475	-8.37772	0.012	0.015	0.018	0.017	0.0155	-6.2954	0.012	0.012	0.016	0.017	0.01425	-6.53753	0.008	0.008	0.015	0.015	0.0115	-7.07022
1	0.013	0.014	0.018	0.014	0.01475	-6.44068	0.016	0.016	0.013	0.014	0.01475	-6.44068	0.012	0.014	0.019	0.017	0.0155	-6.2954	0.011	0.011	0.014	0.011	0.01175	-7.02179	0.015	0.01	0.016	0.02	0.01525	-6.34383
Positive Control	0.607	0.611	0.507	0.532	0.56425
Negative Control	0.042	0.043	0.054	0.053	0.048
Conc. plant compounds (ug/ml)	RL008		RL009		RL011		RL012		RL013
	Mean	SD	Mean	SD	Mean	SD	Mean	SD	Mean	SD
128	-13.4779	0.227271	-4.07642	0.12478	-5.56638	0.00370918	-13.355	0.0877221	-8.91114	0.00102845
64	-9.39945	0.00676082	-5.07766	0.0784997	-4.88274	0.0117345	-10.1442	0.0327672	-7.17742	0.0538505
32	-8.71662	0.136852	-5.44491	0.098445	-6.10353	0.00259642	-8.20308	0.00728348	-6.22581	0.0385586
16	-7.25127	0.0505966	-5.93242	0.033939	-6.03049	0.0362656	-7.42158	0.0509843	-5.88399	0.0345459
8	-6.90945	0.0465839	-6.46956	0.0276334	-6.17698	0.0379854	-6.87293	0.0634185	-6.44535	0.00660908
4	-6.32348	0.0397051	-6.73875	0.0791067	-6.56763	0.0425713	-6.50588	0.0789971	-6.15236	0.00316966
2	-6.25003	0.00431613	-8.27552	0.14454	-6.27424	0.0299263	-6.53071	0.00965229	-7.08016	0.0140612
1	-6.51921	0.111056	-6.49459	0.0762405	-6.29886	0.00488937	-6.98209	0.0561435	-6.29845	0.0641688
Note: When the %hemolysis of the tested concentration is lower than the control (negative value), 0% hemolysis is used as the baseline.
