# Supplementary material for: Assessment of antimycobacterial activities of pure compounds extracted from Thai medicinal plants against clarithromycin-resistant Mycobacterium abscessus
Source: PeerJ. 2021 Oct 26;9:e12391. doi: 10.7717/peerj.12391 (PMC8555507; doi:10.7717/peerj.12391)
Supplement: Supplemental Information 4 — Raw data of effect of plant secondary metabolites on white blood cells (WBCs). [file peerj-09-12391-s004.xlsx]

## Sheet: %Dead cell
Effect of plant secondary metabolites on white blood cells (WBCs)
Round 1
Conc. plant compounds (ug/ml)	Cell count	RL008						RL009						RL011						RL012						RL013
		1	2	3	4	Mean	%Dead cell	1	2	3	4	Mean	%Dead cell	1	2	3	4	Mean	%Dead cell	1	2	3	4	Mean	%Dead cell	1	2	3	4	Mean	%Dead cell
128	Viable cell	2	4	4	3	3.25	23.5294	4	8	3	4	4.75	13.6364	10	10	16	12	12	5.88235	2	4	6	3	3.75	21.0526	7	8	8	9	8	3.0303
	Dead cell	2	0	1	1	1		1	2	0	0	0.75		2	0	1	0	0.75		1	1	1	1	1		0	0	1	0	0.25
	Total cell	4	4	5	4	4.25		5	10	3	4	5.5		12	10	17	12	12.75		3	5	7	4	4.75		7	8	9	9	8.25
64	Viable cell	5	6	8	6	6.25	10.7143	12	3	2	7	6	14.2857	12	9	7	5	8.25	0	6	5	9	6	6.5	21.2121	3	5	7	5	5	9.09091
	Dead cell	1	1	1	0	0.75		2	1	0	1	1		0	0	0	0	0		1	4	1	1	1.75		2	0	0	0	0.5
	Total cell	6	7	9	6	7		14	4	2	8	7		12	9	7	5	8.25		7	9	10	7	8.25		5	5	7	5	5.5
32	Viable cell	4	6	7	8	6.25	3.84615	5	15	20	8	12	7.69231	6	13	8	13	10	9.09091	4	4	8	11	6.75	6.89655	9	2	9	1	5.25	0
	Dead cell	1	0	0	0	0.25		1	2	1	0	1		2	0	1	1	1		0	0	1	1	0.5		0	0	0	0	0
	Total cell	5	6	7	8	6.5		6	17	21	8	13		8	13	9	14	11		4	4	9	12	7.25		9	2	9	1	5.25
16	Viable cell	5	14	5	11	8.75	5.40541	6	12	10	9	9.25	11.9048	19	34	20	17	22.5	2.17391	8	9	14	10	10.25	2.38095	10	11	16	5	10.5	2.32558
	Dead cell	1	1	0	0	0.5		3	1	1	0	1.25		2	0	0	0	0.5		1	0	0	0	0.25		0	0	1	0	0.25
	Total cell	6	15	5	11	9.25		9	13	11	9	10.5		21	34	20	17	23		9	9	14	10	10.5		10	11	17	5	10.75
8	Viable cell	6	14	8	9	9.25	5.12821	11	10	22	16	14.75	1.66667	11	17	11	18	14.25	3.38983	8	13	10	4	8.75	0	8	7	10	4	7.25	6.45161
	Dead cell	0	0	2	0	0.5		1	0	0	0	0.25		1	0	0	1	0.5		0	0	0	0	0		1	1	0	0	0.5
	Total cell	6	14	10	9	9.75		12	10	22	16	15		12	17	11	19	14.75		8	13	10	4	8.75		9	8	10	4	7.75
4	Viable cell	22	6	11	7	11.5	4.16667	23	14	20	23	20	2.43902	14	17	29	12	18	2.7027	10	8	16	5	9.75	7.14286	4	5	7	5	5.25	8.69565
	Dead cell	0	1	1	0	0.5		1	0	0	1	0.5		0	1	1	0	0.5		1	1	0	1	0.75		1	0	0	1	0.5
	Total cell	22	7	12	7	12		24	14	20	24	20.5		14	18	30	12	18.5		11	9	16	6	10.5		5	5	7	6	5.75
2	Viable cell	8	10	12	9	9.75	0	11	4	11	11	9.25	2.63158	14	10	16	7	11.75	4.08163	6	8	14	5	8.25	5.71429	6	10	7	9	8	3.0303
	Dead cell	0	0	0	0	0		0	1	0	0	0.25		0	0	1	1	0.5		2	0	0	0	0.5		1	0	0	0	0.25
	Total cell	8	10	12	9	9.75		11	5	11	11	9.5		14	10	17	8	12.25		8	8	14	5	8.75		7	10	7	9	8.25
1	Viable cell	12	8	8	9	9.25	2.63158	10	12	9	10	10.25	2.38095	5	6	6	5	5.5	0	5	10	7	13	8.75	5.40541	5	7	8	7	6.75	0
	Dead cell	0	1	0	0	0.25		0	0	1	0	0.25		0	0	0	0	0		1	0	1	0	0.5		0	0	0	0	0
	Total cell	12	9	8	9	9.5		10	12	10	10	10.5		5	6	6	5	5.5		6	10	8	13	9.25		5	7	8	7	6.75
Negative Control	Viable cell	16	13	17	16	15.5	0
	Dead cell	0	0	0	0	0
	Total cell	16	13	17	16	15.5
Round 2
Conc. plant compounds (ug/ml)	Cell count	RL008						RL009						RL011						RL012						RL013
		1	2	3	4	Mean	%Dead cell	1	2	3	4	Mean	%Dead cell	1	2	3	4	Mean	%Dead cell	1	2	3	4	Mean	%Dead cell	1	2	3	4	Mean	%Dead cell
128	Viable cell	3	3	2	3	2.75	15.3846	4	4	0	2	2.5	9.09091	3	5	10	4	5.5	18.5185	2	8	7	2	4.75	17.3913	5	2	11	10	7	3.44828
	Dead cell	1	0	0	1	0.5		0	1	0	0	0.25		1	1	1	2	1.25		1	1	1	1	1		0	0	1	0	0.25
	Total cell	4	3	2	4	3.25		4	5	0	2	2.75		4	6	11	6	6.75		3	9	8	3	5.75		5	2	12	10	7.25
64	Viable cell	2	5	3	6	4	20	2	3	6	4	3.75	21.0526	8	8	15	5	9	2.7027	11	4	3	3	5.25	12.5	4	12	6	3	6.25	7.40741
	Dead cell	0	2	2	0	1		3	0	0	1	1		1	0	0	0	0.25		1	0	1	1	0.75		1	0	0	1	0.5
	Total cell	2	7	5	6	5		5	3	6	5	4.75		9	8	15	5	9.25		12	4	4	4	6		5	12	6	4	6.75
32	Viable cell	9	6	10	7	8	5.88235	10	11	14	7	10.5	8.69565	10	12	8	9	9.75	0	3	10	11	8	8	5.88235	7	7	11	4	7.25	9.375
	Dead cell	1	0	0	1	0.5		0	1	2	1	1		0	0	0	0	0		1	0	1	0	0.5		0	1	1	1	0.75
	Total cell	10	6	10	8	8.5		10	12	16	8	11.5		10	12	8	9	9.75		4	10	12	8	8.5		7	8	12	5	8
16	Viable cell	14	21	8	2	11.25	6.25	7	19	15	5	11.5	0	10	13	12	15	12.5	1.96078	6	13	4	6	7.25	3.33333	5	11	6	2	6	11.1111
	Dead cell	1	1	1	0	0.75		0	0	0	0	0		0	0	1	0	0.25		1	0	0	0	0.25		1	0	1	1	0.75
	Total cell	15	22	9	2	12		7	19	15	5	11.5		10	13	13	15	12.75		7	13	4	6	7.5		6	11	7	3	6.75
8	Viable cell	14	15	8	9	11.5	4.16667	21	18	19	13	17.75	1.38889	12	11	15	18	14	0	6	7	6	7	6.5	0	7	13	11	3	8.5	5.55556
	Dead cell	0	2	0	0	0.5		0	1	0	0	0.25		0	0	0	0	0		0	0	0	0	0		0	1	1	0	0.5
	Total cell	14	17	8	9	12		21	19	19	13	18		12	11	15	18	14		6	7	6	7	6.5		7	14	12	3	9
4	Viable cell	6	13	9	8	9	0	27	11	21	20	19.75	2.46914	15	9	12	16	13	5.45455	6	19	13	8	11.5	6.12245	5	5	2	7	4.75	5
	Dead cell	0	0	0	0	0		0	1	0	1	0.5		0	2	0	1	0.75		1	1	0	1	0.75		1	0	0	0	0.25
	Total cell	6	13	9	8	9		27	12	21	21	20.25		15	11	12	17	13.75		7	20	13	9	12.25		6	5	2	7	5
2	Viable cell	6	9	8	10	8.25	0	9	17	15	11	13	3.7037	8	13	7	3	7.75	6.06061	10	8	6	4	7	6.66667	11	4	6	5	6.5	7.14286
	Dead cell	0	0	0	0	0		1	0	0	1	0.5		1	0	1	0	0.5		1	0	1	0	0.5		0	1	1	0	0.5
	Total cell	6	9	8	10	8.25		10	17	15	12	13.5		9	13	8	3	8.25		11	8	7	4	7.5		11	5	7	5	7
1	Viable cell	9	7	8	5	7.25	0	9	12	13	15	12.25	2	7	4	4	2	4.25	10.5263	7	12	7	3	7.25	6.45161	7	19	9	8	10.75	2.27273
	Dead cell	0	0	0	0	0		0	1	0	0	0.25		0	1	1	0	0.5		0	1	1	0	0.5		0	0	0	1	0.25
	Total cell	9	7	8	5	7.25		9	13	13	15	12.5		7	5	5	2	4.75		7	13	8	3	7.75		7	19	9	9	11
Negative Control	Viable cell	8	15	13	4	10	0
	Dead cell	0	0	0	0	0
	Total cell	8	15	13	4	10
	Conc. plant compounds (ug/ml)	RL008		RL009		RL011		RL012		RL013
		Mean	SD	Mean	SD	Mean	SD	Mean	SD	Mean	SD
	128	19.457	5.75924	11.3636	3.21412	12.2004	8.93512	19.222	2.58895	3.23929	0.295551
	64	15.3571	6.56599	17.6692	4.78493	1.35135	1.9111	16.8561	6.1604	8.24916	1.19042
	32	4.86425	1.43981	8.19398	0.709472	4.54545	6.42824	6.38945	0.717147	4.6875	6.62913
	16	5.8277	0.597219	5.95238	8.41794	2.06735	0.150705	2.85714	0.673435	6.71835	6.21231
	8	4.64744	0.67991	1.52778	0.196419	1.69492	2.39697	0	0	6.00358	0.633608
	4	2.08333	2.94628	2.45408	0.021292	4.07862	1.94585	6.63265	0.721538	6.84783	2.61322
	2	0	0	3.16764	0.758107	5.07112	1.39935	6.19048	0.673435	5.08658	2.90801
	1	1.31579	1.86081	2.19048	0.269374	5.26316	7.44323	5.92851	0.73978	1.13636	1.60706

## Sheet: Statistical analysis
Effect of plant secondary metabolites on white blood cells (WBCs)
Conc. plant compounds (ug/ml)	%Dead cell (Mean)					P-value
	RL008	RL009	RL011	RL012	RL013	RL008 vs RL009	RL008 vs RL011	RL008 vs RL012	RL008 vs RL013	RL009 vs RL011	RL009 vs RL012	RL009 vs RL013	RL011 vs RL012	RL011 vs RL013	RL012 vs RL013
1	1.31579	2.19048	5.26316	5.92851	1.13636	0.814	0.313	0.247	0.961	0.423	0.337	0.777	0.858	0.294	0.232
2	0	3.16764	5.07112	6.19048	5.08658	0.091	0.020*	0.009*	0.020*	0.263	0.102	0.26	0.492	0.992	0.498
4	2.08333	2.45408	4.07862	6.63265	6.84783	0.86	0.364	0.071	0.062	0.453	0.09	0.078	0.256	0.222	0.916
8	4.64744	1.52778	1.69492	0	6.00358	0.042*	0.05	0.010*	0.293	0.892	0.242	0.012*	0.201	0.013*	0.003*
16	5.8277	5.95238	2.06735	2.85714	6.71835	0.981	0.459	0.554	0.857	0.446	0.539	0.876	0.873	0.367	0.448
32	4.86425	8.19398	4.54545	6.38945	4.6875	0.403	0.942	0.731	0.968	0.368	0.606	0.383	0.678	0.974	0.702
64	15.3571	17.6692	1.35135	16.8561	8.24916	0.641	0.030*	0.761	0.189	0.017*	0.868	0.1	0.021*	0.199	0.125
128	19.457	11.3636	12.2004	19.222	3.23929	0.174	0.214	0.965	0.025*	0.876	0.184	0.172	0.227	0.14	0.026*
One-way ANOVA followed by post-hoc LSD test was used to determine significant differences (*P<0.05)
